# Supplementary material
Source: Elsevier journal article supplement (https://www.sciencedirect.com/science/article/pii/S1138359320303191)
Supplement: mmc1 [file S1138359320303191:mmc1.pdf]

## MATERIAL COMPLEMENTARIO

### CUADERNO DE RECOGIDA DE DATOS

#### Manejo del paciente con Dislipemia Aterogénica (DA) en el medio asistencial de Atención Primaria. Estudio AVANZA

##### Cuestionario del profesional

#### INFORMACIÓN DEL ESTUDIO Y CONSENTIMIENTO DE PARTICIPACIÓN

Agradeciendo de antemano su colaboración, estos ítem no pretenden examinar conocimientos, sino recoger opiniones para crear oportunidades de mejora en el abordaje de la DA por parte del médico de Atención Primaria (AP).

(Se incluirá un resumen del protocolo del estudio. Una vez leído el contenido, el participante deberá asegurar que ha leído y comprendido la información referida al estudio y que consiente de manera voluntaria participar en el mismo, marcando una casilla destinada a tal fin)

#### INSTRUCCIONES DE CUMPLIMENTACIÓN

Por favor, marque en cada cuestión la opción que más se ajuste a su opinión. En algunas preguntas tendrá que escribir un número en las casillas correspondientes.

Recuerde que no existen respuestas correctas o incorrectas, por lo que responda con total sinceridad lo que usted considere sin dejar ninguna pregunta sin contestar.

#### VARIABLES SOCIODEMOGRÁFICAS

Edad : \_\_\_\_\_ años

Sexo:

☐ Hombre

☐ Mujer

Tiempo ejerciendo la especialidad: \_\_\_\_\_ años.

Antecedentes personales de dislipemia aterogénica (¿ha sido usted diagnosticado o tratado por dislipemia aterogénica?):

☐ Sí      ☐ No

Número aproximado de pacientes con dislipemia aterogénica que asisten a su consulta en un mes: \_\_\_\_\_

Provincia en la que ejerce la especialidad: \_\_\_\_\_

Área en la que se encuentra el centro sanitario en el que ejerce su especialidad.

- ☐ Área rural
- ☐ Área semiurbana
- ☐ Área urbana

## RIESGO RESIDUAL CARDIOVASCULAR

### 1.1 ¿Valora el riesgo residual cardiovascular en su práctica clínica diaria?

- ☐ Sí, pero sólo en pacientes en prevención secundaria.
- ☐ No tengo claro que es el riesgo cardiovascular residual.
- ☐ Sí, siempre que lo recuerdo.
- ☐ No, porque el riesgo residual es un concepto teórico sin repercusión clínica.

### 1.2 ¿A qué cree que se refiere el riesgo residual cardiovascular de origen lipídico?

- ☐ El que permanece tras controlar el peso del paciente.
- ☐ El que permanece tras tratar a un paciente con estatinas y lograr objetivos de cLDL.
- ☐ El que queda tras controlar todos los factores de riesgo modificables.
- ☐ El que queda tras abandonar el tabaco como factor de riesgo mayor.

### 1.3 ¿A qué se atribuye el riesgo residual de origen lipídico?

- ☐ La edad.
- ☐ La hipertensión arterial.
- ☐ La obesidad.
- ☐ La dislipemia aterogénica.

## DISLIPEMIA ATEROGÉNICA

### 2.1 ¿En su opinión, por qué se caracteriza la DA?

- ☐ Por la elevación del cLDL.
- ☐ Por cifras normales o elevación moderada del cLDL y por un fenotipo de partículas de LDL pequeñas y densas.
- ☐ Por el descenso del cHDL y elevación de los triglicéridos (TG).
- ☐ Por el descenso de cHDL, aumento de TG y aumento de partículas LDL pequeñas y densas.

### 2.2 Por favor, indique algún fenotipo que crea asociado a la DA:

- ☐ La enfermedad coronaria precoz.
- ☐ El síndrome metabólico.
- ☐ La diabetes tipo 2.
- ☐ Todos los anteriores pueden serlo.

### **2.3 Por favor, señale la afirmación que le parezca más adecuada:**

- ☐ La DA no se acompaña de un riesgo cardiovascular alto o muy alto.
- ☐ La DA no tiene especial importancia en la diabetes tipo 2, tanto en sus complicaciones macro como microvasculares.
- ☐ La DA constituye un factor determinante del riesgo cardiovascular a pesar de que los niveles de cLDL sean adecuados.
- ☐ La DA no se expresa en los pacientes con obesidad.

### **2.4 ¿Cuál es el motivo por el cual usted valora específicamente la existencia de una DA en su práctica clínica?**

- ☐ Debido a que está incrementado el riesgo cardiovascular.
- ☐ Por estar incrementado el riesgo cardiovascular al asociarse a obesidad.
- ☐ Porque se debe dar tratamiento con fibratos.
- ☐ Porque si coexiste con diabetes hay que tratarla siempre con insulina.

## **DIAGNÓSTICO DE LA DA**

### **3.1 ¿Qué componentes del perfil lipídico considera imprescindibles para la valoración de un paciente con DA?**

- ☐ Colesterol total.
- ☐ Colesterol total y cHDL.
- ☐ Colesterol total, TG y cHDL.
- ☐ Colesterol total, TG, cHDL, cLDL y colesterol no-HDL.

### **3.2 En un varón de 58 años diagnosticado de síndrome metabólico, ¿cuál sería el objetivo de control lipídico más importante de este paciente?:**

- ☐ Los triglicéridos.
- ☐ El cHDL.
- ☐ El cLDL.
- ☐ El colesterol no-HDL.

### **3.3 ¿En su práctica clínica puede solicitar fraccionamiento del colesterol total y valorar el cHDL y el cLDL?**

- ☐ No.
- ☐ Sí, pero me guío solo con el colesterol total.
- ☐ Sí, pero derivando al paciente.
- ☐ Sí, de forma habitual sin restricciones.

### **3.4. ¿Con qué frecuencia utiliza los siguientes índices lipoproteicos? Considerando 1: nunca; 2: casi nunca; 3: algunas veces; 4: frecuentemente; 5: muy frecuentemente.**

| Índices aterogénicos  | Nunca | Casi nunca | Algunas veces | Frecuentemente | Muy frecuentemente |
|-----------------------|-------|------------|---------------|----------------|--------------------|
| Cociente CT/cHDL      | 1     | 2          | 3             | 4              | 5                  |
| Cociente cLDL/cHDL    | 1     | 2          | 3             | 4              | 5                  |
| Cociente ApoB/Apo AI  | 1     | 2          | 3             | 4              | 5                  |
| Cociente no cHDL/cHDL | 1     | 2          | 3             | 4              | 5                  |
| Cociente TG /cHDL     | 1     | 2          | 3             | 4              | 5                  |
| Cociente cLDL/ApoB    | 1     | 2          | 3             | 4              | 5                  |

3.5. Aunque no lo use, indique que tan útil es cada uno de los índices aterogénicos en la práctica clínica, Considerando 1: no es útil y 5 muy útil

| Índices aterogénicos  | No es útil | Poco útil | Útil | Muy útil |
|-----------------------|------------|-----------|------|----------|
| Cociente CT/cHDL      | 1          | 2         | 3    | 4        |
| Cociente cLDL/cHDL    | 1          | 2         | 3    | 4        |
| Cociente ApoB/Apo AI  | 1          | 2         | 3    | 4        |
| Cociente no cHDL/cHDL | 1          | 2         | 3    | 4        |
| Cociente TG /cHDL     | 1          | 2         | 3    | 4        |
| Cociente cLDL/ApoB    | 1          | 2         | 3    | 4        |

## TRATAMIENTO DE LA DA

### 4.1 ¿Cuál cree que debe ser el primer paso para abordar una DA?

- ☐ Dieta adaptada para alcanzar un IMC adecuado.
- ☐ Además de dieta, abandono del tabaco si coexiste.
- ☐ Lo anterior más realización de ejercicio físico regular.
- ☐ Dieta, ejercicio físico reglado, abandono del tabaco y si precisa, tratamiento farmacológico.

### 4.2 ¿Cómo abordaría a un paciente con DA asociado a obesidad?

- ☐ Derivo al paciente a enfermería.
- ☐ Derivo al paciente a endocrinología.
- ☐ Trato al paciente conjuntamente con enfermería.
- ☐ Insisto en modificar el estilo de vida y valoro el uso de tratamiento farmacológico.

### 4.3 Por favor, de las siguientes afirmaciones acerca del tratamiento con estatinas señale su grado de acuerdo.

|                                                                                                                                   | <i>Totalmente en desacuerdo</i> | <i>Parcialmente en desacuerdo</i> | <i>Indiferente</i> | <i>Parcialmente de acuerdo</i> | <i>Totalmente de acuerdo</i> |
|-----------------------------------------------------------------------------------------------------------------------------------|---------------------------------|-----------------------------------|--------------------|--------------------------------|------------------------------|
| <i>Las estatinas neutralizan todo el riesgo cardiovascular residual si se llega a cifras objetivo de cLDL.</i>                    | 1                               | 2                                 | 3                  | 4                              | 5                            |
| <i>La pravastatina tiene un metabolismo hepático activo y no debe usarse en casos de polifarmacia.</i>                            | 1                               | 2                                 | 3                  | 4                              | 5                            |
| <i>El riesgo residual asociado a triglicéridos altos y/o cHDL bajo no se elimina solo con estatinas.</i>                          | 1                               | 2                                 | 3                  | 4                              | 5                            |
| <i>La dieta y el abandono de hábitos tóxicos si se hacen adecuadamente suele ser suficiente para eliminar el riesgo residual.</i> | 1                               | 2                                 | 3                  | 4                              | 5                            |

**4.4 En un paciente con un cLDL ligeramente elevado, una disminución del cHDL y los TG por encima de 150 mg/dl, en el que no se logra control del perfil lipídico con una estatina, por favor, indique como controlaría al paciente:**

|                                         | <i>Totalmente en desacuerdo</i> | <i>Parcialmente en desacuerdo</i> | <i>Indiferente</i> | <i>Parcialmente de acuerdo</i> | <i>Totalmente de acuerdo</i> |
|-----------------------------------------|---------------------------------|-----------------------------------|--------------------|--------------------------------|------------------------------|
| <b>Doblaría la dosis de estatinas</b>   | 1                               | 2                                 | 3                  | 4                              | 5                            |
| <b>Asociaría ezetimiba</b>              | 1                               | 2                                 | 3                  | 4                              | 5                            |
| <b>Asociaría ácido nicotínico</b>       | 1                               | 2                                 | 3                  | 4                              | 5                            |
| <b>Asociaría un fibrato.</b>            | 1                               | 2                                 | 3                  | 4                              | 5                            |
| <b>Asociaría resinas de intercambio</b> | 1                               | 2                                 | 3                  | 4                              | 5                            |

**4.5 ¿Cuál tratamiento cree que es el más apropiado para abordar el manejo de un cHDL bajo?**

|                         | <b>No es útil</b> | <b>Poco útil</b> | <b>Útil</b> | <b>Muy útil</b> |
|-------------------------|-------------------|------------------|-------------|-----------------|
| <b>Fibratos.</b>        | 1                 | 2                | 3           | 4               |
| <b>Estatinas</b>        | 1                 | 2                | 3           | 4               |
| <b>Omega3</b>           | 1                 | 2                | 3           | 4               |
| <b>Ácido nicotínico</b> | 1                 | 2                | 3           | 4               |

**4.6 Con respecto a los TG, por favor, indique su grado de acuerdo en referencia a las siguientes afirmaciones:**

|                                                                                                        | <i>Totalmente en desacuerdo</i> | <i>Parcialmente en desacuerdo</i> | <i>Indiferente</i> | <i>Parcialmente de acuerdo</i> | <i>Totalmente de acuerdo</i> |
|--------------------------------------------------------------------------------------------------------|---------------------------------|-----------------------------------|--------------------|--------------------------------|------------------------------|
| <b>No son un factor de riesgo cardiovascular "per se"</b>                                              | 1                               | 2                                 | 3                  | 4                              | 5                            |
| <b>Son un factor de riesgo cardiovascular cuando se asocian a otros parámetros lipídicos alterados</b> | 1                               | 2                                 | 3                  | 4                              | 5                            |
| <b>Son un factor de riesgo cardiovascular independiente</b>                                            | 1                               | 2                                 | 3                  | 4                              | 5                            |

**4.7 Por favor, indique qué opción cree que es la correcta:**

- ☐ El control global del perfil lipídico ante una DA suele precisar con frecuencia tratamiento hipolipemiente combinado.
- ☐ El uso de fibratos a largo plazo en pacientes con DM2 reduce significativamente el riesgo de infarto de miocardio no fatal (1).
- ☐ El estudio ACCORD demostró que tratar la DA en diabéticos originaba un beneficio en la prevención cardiovascular.(2)

- ☐ Todas las afirmaciones anteriores me parecen correctas.

#### 4.8 Según su opinión el fibrato más adecuado para asociar a estatinas es:

|                                                                         | Totalmente en desacuerdo | Parcialmente en desacuerdo | Indiferente | Parcialmente de acuerdo | Totalmente de acuerdo |
|-------------------------------------------------------------------------|--------------------------|----------------------------|-------------|-------------------------|-----------------------|
| <b>Gemfibrozilo es el fibrato más adecuado para asociar a estatinas</b> | 1                        | 2                          | 3           | 4                       | 5                     |
| <b>Fenofibrato es el fibrato más adecuado para asociar a estatinas</b>  | 1                        | 2                          | 3           | 4                       | 5                     |
| <b>Cualquiera de los dos</b>                                            | 1                        | 2                          | 3           | 4                       | 5                     |
| <b>No se deben asociar fibratos a estatinas</b>                         | 1                        | 2                          | 3           | 4                       | 5                     |

#### 4.9 Varón de 67 años con síndrome coronario agudo sin elevación de ST (SCASEST), DM 2 y obesidad en tratamiento con atorvastatina 80mg y su perfil lipídico: cLDL 66 mg/dl, TG 260 mg/dl y cHDL 36 mg/dl. Por favor, indique como abordaría el tratamiento del paciente:

- ☐ El objetivo LDL está cumplido por lo que ha disminuido su RCV.
- ☐ El paciente no tiene riesgo residual y no habrá que tratarlo.
- ☐ El paciente presenta una DA y hay que asociar un fibrato.
- ☐ En ningún caso se puede asociar fibrato a una estatina a esas dosis.

#### 4.10 Si su paciente presenta una DA, el tratamiento es:

- ☐ Estatina + fibrato de inicio.
- ☐ Estatina a altas dosis y una vez se consiga LDL en objetivo valorar otro fármaco.
- ☐ Estatina + ácido nicotínico.
- ☐ Comenzar con fibrato y valorar estatina si no se consiguen objetivos.

#### 4.11 ¿Cuál de las siguientes afirmaciones NO considera cierta?

- ☐ El control global del perfil lipídico en el pacientes con DA requiere con bastante frecuencia el tratamiento combinado hipolipemiante.
- ☐ El fenofibrato es el fármaco de elección para su asociación con estatinas.
- ☐ El gemfibrozilo es el fármaco con menor potencial de interacciones para su uso combinado con estatinas.
- ☐ Los fibratos son el tratamiento de elección para el tratamiento de la hipertrigliceridemia.
